# Supplementary material
Source: PubMed Central journal article supplement (PMC2860672)
Supplement: NIHMS193611-supplement-1_si_001.pdf [file NIHMS193611-supplement-1_si_001.pdf]

Supplementary Information for

Kinetic and Inhibition Studies of Dihydroxybenzoate-AMP Ligase (EntE)  
from *Escherichia coli*<sup>†</sup>

Alison L. Sikora<sup>1</sup>, Daniel J. Wilson<sup>2</sup>, Courtney C. Aldrich<sup>2</sup>, and John S. Blanchard<sup>1\*</sup>

<sup>1</sup>Albert Einstein College of Medicine, Department of Biochemistry

1300 Morris Park Avenue, Bronx, NY 10461

<sup>2</sup>Center for Drug Design, Academic Health Center, University of Minnesota,

Minneapolis, MN 55455

|      |     |            |             |             |            |             |            |     |
|------|-----|------------|-------------|-------------|------------|-------------|------------|-----|
| Ente | 1   | -----      | ----MSIPE   | TRWPEEFARR  | YREKGYWQDL | PLTDILTRHA  | AS--DSLAVI | 43  |
| DhbE | 1   | -----      | ----MLKGF   | TPWPDELAET  | YRKNGCWAGE | TFGDLLRDRA  | AKYGDRIAIT | 45  |
| VibE | 1   | -----      | ----MTTDF   | TPWPEALAAQ  | YRQLGYWQDK | TLLDYLQQSA  | ERTPNALALV | 45  |
| YbtE | 1   | -----      | ----MNSSF   | ----ESLIEQ  | YP-----L   | PIAEQLRHWA  | ARYASRIAVV | 34  |
| MbtA | 1   | MPPKAADGRR | PSPDGGGLGGE | VFPFADRAAS  | YRAAGYWSGR | TLDTVLSDAA  | RRWPDRLAVA | 60  |
| Ente | 44  | DG-----ERQ | LSYRELNQAA  | DNLACSLRRQ  | GIKPGETALV | QLGNVAELYI  | TFFALLKLGV | 98  |
| DhbE | 46  | CG-----NTH | WSYRELDTRA  | DRLAAGFQKL  | GIQKDRVVV  | QLPNIKEFFE  | VIFALFRLGA | 100 |
| VibE | 46  | GD-----NQQ | WRYQAMLERI  | EQLAAGFTEL  | GLGCGDNVVL | QLGNVAEFYL  | CFFALLRQGI | 100 |
| YbtE | 35  | DA-----KGS | LTYSALDAQV  | DELAAGLSSL  | GLRSGEHVIV | QLPNDNAFVT  | LLFALLRLGV | 89  |
| MbtA | 61  | DAGDRPGHGG | LSYAEIDQRA  | DRAAAALHGL  | GITPGRVLL  | QLPNGCQFAV  | ALFALLRAGA | 120 |
| Ente | 99  | APVLALFSHQ | RSELNAYASQ  | IEPALLIADR  | QHALLSGDDF | LNTFVTEHSS  | IRVVQLHNDS | 158 |
| DhbE | 101 | LPVFALPSHR | SSEITYFCEF  | AEEAAAYIIPD | AYSGFDYRSL | ARQVQSKLPT  | LKNIIVAGEA | 160 |
| VibE | 101 | RPILALPAHR | LAETRYFCQH  | SQAKAYLIDG  | AQRPFQYQAL | AQELLACCPY  | LQTVIVRQGT | 160 |
| YbtE | 90  | IPVLAMPSQR | ALDIDALIEL  | AQPVAYVIHG  | EN----HAEL | ARQMAHKHAC  | LRHVLVAGET | 145 |
| MbtA | 121 | IPVMCLPGHR | AAELGHFAAV  | SAATGLVVAD  | VASGFDYRPM | ARELVADHPT  | LRHVIVDGGP | 180 |
| Ente | 159 | GEHN---LQD | AINHPAEDFT  | ATPSPADEVV  | YFQLSGGTTG | TPKLIPTRTHN | DYYSVRRSV  | 215 |
| DhbE | 161 | EEFLP--LED | LHTEPVKLEPE | VKSSD---VA  | FLQLSGGSGT | LSKLIPTRTHD | DYIYSLKRSV | 215 |
| VibE | 161 | RVTDPKFIEL | ASCYSASSCQ  | ANADP-NQIA  | FFQLSGGTTD | TPKLIPTRTHN | DYAYSVTASV | 219 |
| YbtE | 146 | VSDDFTPLFS | LHGERQAWPQ  | PDVSA---TA  | LLLLSGGTTG | TPKLIPTRTHA | DYSYNFASAS | 202 |
| MbtA | 181 | GPFVS--WAQ | LCAQAGTGSP  | APPADPGSPA  | LLLVSOGTTG | MPKLIPTRTHD | DYVFNATASA | 238 |
| Ente | 216 | EICQFTQQTR | YLCAIPAAHN  | YAMSSPGSLG  | VFLAGGTVVL | AADPSATLCF  | PLIEKHQVNV | 275 |
| DhbE | 216 | EVCFWDHSTV | YLAALPMAHN  | YPLSSPGVVG  | VLYAGGRVVL | SPSPSPEIAF  | PLIEREKVTI | 275 |
| VibE | 220 | EICRFDQHTR | YLCVLPAAHN  | FPLSSPGALG  | VFWAGGCVVV | SQDASPQHAF  | KLIEQHKITV | 279 |
| YbtE | 203 | ELCGISQQSV | YLAVLPVAHN  | FPLACPGILG  | TLACGGKVVV | TDASACDEVM  | PLIAQERVTH | 262 |
| MbtA | 239 | ALCRLSADDV | YLVVLAAGHN  | FPLACPGLLG  | AMTVGATAVF | APDPSPEAAF  | AAIERHGVTV | 298 |
| Ente | 276 | TALVPPAVSL | WLQALTEGES  | RAQLASLKL   | QVGGARLSAT | LAARIPAEIG  | CQLQQVFGMA | 335 |
| DhbE | 276 | TALVPPLAMV | WMDAASS--R  | RDDLSSLQVL  | QVGGAKFSAE | AARRVKAVFG  | CTLQQVFGMA | 333 |
| VibE | 280 | TALVPPALAL | WMDHAEK--S  | TYDLSLHFV   | QVGGAKFSEA | AARRLPKALG  | CQLQQVFGMA | 337 |
| YbtE | 263 | VALVPALACL | WVQAREW--E  | DSDLSSLRVI  | QAGGARLDPT | LAEQVIATFD  | CTLQQVFGMA | 320 |
| MbtA | 299 | TALVPALAKL | WAQSCW--E   | PVTPKSLRLL  | QVGGSKLEPE | DARRVRTALT  | PGLQQVFGMA | 356 |
| Ente | 336 | EGLVNYTRLD | DSAEKIHTQ   | GYPMCPDDEV  | WVADAEGNPL | PQGEVGRIMT  | RGPYTFRGYY | 395 |
| DhbE | 334 | EGLVNYTRLD | DPEETIVNTQ  | GKPMSPYDEV  | RWDDHDRDV  | KPGETGHLIT  | RGPYTIRGYY | 393 |
| VibE | 338 | EGLVNYTRLD | DSAEIATATQ  | GRPISAHQDL  | LWVDEQGQPV | ASGEEGYLLT  | QGPYTIRGYY | 397 |
| YbtE | 321 | EGLLCFTRLD | DPHATILHSQ  | GRPLSPLDEI  | RIVDQDENDV | APGETGQLLT  | RGPYTISGYY | 380 |
| MbtA | 357 | EGLNFTTRIG | DPPEVVEHTQ  | GRPLCPADEL  | RIVNADGEPV | GPGEEGELLV  | RGPYTLNGYF | 416 |
| Ente | 396 | KSPQHNASAF | DANGFYCSGD  | LISIDPEGYI  | TVQGREKDQI | NRGGEKIAAE  | EIENLLLRHP | 455 |
| DhbE | 394 | KAEEHNAASF | TEDGFYRTGD  | IVRLTRDGYI  | VVEGRAKDQI | NRGGEKVAAE  | EVENHLLAHP | 453 |
| VibE | 398 | RADQHNQRAF | NAQGFYITGD  | KVKLSSEGYV  | IYVTRAKDQI | NRGGEKIAAE  | EVENQLLRHP | 457 |
| YbtE | 381 | RAPAHNAQAF | TAQGFYRTGD  | NVRLDEVGNL  | HVEGRIKEQI | NRAGEKIAAA  | EVESALLRLA | 440 |
| MbtA | 417 | AAERDNERCF | DPDGFYRSGD  | LVRRRDDGNL  | VVTGRVKDVI | CRAGETIAAS  | DLEEQLLSHP | 476 |
| Ente | 456 | AVIYAALVSM | EDELMGEKSC  | AYLVVK--EP  | LRAVQVRRFL | REQGIAEFKL  | PDRVECVDSL | 513 |
| DhbE | 454 | AVHDAAMVSM | PDQFLGERSC  | VFIIPR-DEA  | PKAAELKAPL | RERGLAAYKI  | PDRVEFVESF | 512 |
| VibE | 458 | AVHDAALIAI | SDEYLGERSC  | AVIVLKPEQS  | VNTIQLKRFL | HQAGLADYKI  | PDQIQFIDQL | 517 |
| YbtE | 441 | EVQDCAVVAA | PDTLGERIC   | AFITIAQ-QVP | TDYQQLRQQL | TRMGLSAWKI  | PDQIEFLDHW | 499 |
| MbtA | 477 | AIFSAAAVGL | PDQYLGEKIC  | AAVVFA-GAP  | ITLAEANGYL | DRRGVAAHTR  | PDQLVAMPAL | 535 |
| Ente | 514 | PLTAVGKVDK | KQLRQWLASR  | ASA-----    | 536        |             |            |     |
| DhbE | 513 | PQTGVGKVS  | KALREAISEK  | LLAGFK---   | 539        |             |            |     |
| VibE | 518 | PKTSVGKIDK | NALRRRFDTL  | GLALMS----  | 543        |             |            |     |
| YbtE | 500 | PLTAVGKIDK | KRLTALAADR  | YRHSAQ----  | 525        |             |            |     |
| MbtA | 536 | ETTPIGKIDK | RAIVRQLGIA  | TGPVTTQRCH  | 565        |             |            |     |

**Figure S1.** Sequence conservation of aryl acid adenylating enzymes (AAAE) in siderophore biosynthetic pathways. Sequence alignment of adenylate-forming enzymes from *Escherichia coli* (gi:284822083) and homologues from *Bacillus subtilis* (gi:23306686), *Vibrio cholerae* (gi:9837411), *Yersinia pestis* (gi:3818608), and *Mycobacterium tuberculosis* (gi:3261670). Identical and similar residues are highlighted in green and yellow shading, respectively. Residues N235 and S240 are indicated by red asterisks.
